# Supplementary material for: Hospitalizations for COVID-19 Among US People Experiencing Incarceration or Homelessness
Source: PubMed Central journal article supplement (PMC8759002; doi:10.1001/jamanetworkopen.2021.43407), 2022-01-13
Supplement: jamanetwopen-e2143407-s001.pdf [file jamanetwopen-e2143407-s001.pdf]

## Supplementary Online Content

Montgomery MP, Hong K, Clarke KEN, et al. Hospitalizations for COVID-19 among US people experiencing incarceration or homelessness. *JAMA Netw Open*. 2022;5(1):e2143407. doi:10.1001/jamanetworkopen.2021.43407

**eTable 1.** List of *ICD-10-CM* and Procedure Codes for Underlying Medical Conditions

**eTable 2.** List of *ICD-10-CM* and Procedure Codes for Acute Complications

**eTable 3.** Full Multivariable Results for COVID-19 Hospitalization Outcomes Among People Experiencing Incarceration and People Experiencing Homelessness, United States, April 2020–June 2021

**eTable 4.** Sensitivity Analyses for COVID-19 Hospitalization Outcomes for People Experiencing Incarceration and People Experiencing Homelessness, United States, April 2020–June 2021

This supplementary material has been provided by the authors to give readers additional information about their work.

**eTable 1.** List of *ICD-10-CM* and Procedure Codes for Underlying Medical Conditions

|                                                         |        |
|---------------------------------------------------------|--------|
| <b>Asthma</b>                                           |        |
| Moderate persistent asthma                              | J45.4  |
| Severe persistent asthma                                | J45.5  |
| Other and unspecified asthma                            | J45.9  |
| Other asthma                                            | J45.99 |
| <b>Chronic obstructive pulmonary disease (COPD)</b>     |        |
| Bronchitis, not specified as acute or chronic           | J40    |
| Simple and mucopurulent chronic bronchitis              | J41    |
| Unspecified chronic bronchitis                          | J42    |
| Emphysema                                               | J43    |
| Other chronic obstructive pulmonary disease             | J44    |
| <b>Cystic fibrosis</b>                                  |        |
| Cystic fibrosis                                         | E84    |
| <b>Pulmonary fibrosis</b>                               |        |
| Other interstitial pulmonary diseases                   | J84    |
| <b>Other lung conditions</b>                            |        |
| Respiratory tuberculosis                                | A15    |
| Pulmonary mycobacterial infection                       | A31.0  |
| Histoplasmosis                                          | B39    |
| Blastomycosis                                           | B40    |
| Paracoccidioimycosis                                    | B41    |
| Aspergillosis                                           | B44    |
| Cryptococcosis                                          | B45    |
| Pulmonary mucormycosis                                  | B46.0  |
| Sarcoidosis of lung                                     | D86.0  |
| Alpha-1-antitrypsin deficiency                          | E88.01 |
| Bronchiectasis                                          | J47    |
| Coalworker's pneumoconiosis                             | J60    |
| Pneumoconiosis due to asbestos and other mineral fibers | J61    |
| Pneumoconiosis due to dust containing silica            | J62    |
| Pneumoconiosis due to other inorganic dusts             | J63    |
| Unspecified pneumoconiosis                              | J64    |
| Pneumoconiosis associated with tuberculosis             | J65    |

**eTable 1.** List of *ICD-10-CM* and Procedure Codes for Underlying Medical Conditions

|                                                                                                                                             |       |
|---------------------------------------------------------------------------------------------------------------------------------------------|-------|
| Airway disease due to specific organic dust                                                                                                 | J66   |
| Hypersensitivity pneumonitis due to organic dust                                                                                            | J67   |
| Respiratory conditions due to inhalation of chemicals, gases, fumes and vapors                                                              | J68   |
| Pneumonitis due to solids and liquids*                                                                                                      | J69   |
| Respiratory conditions due to other external agents                                                                                         | J70   |
| Pulmonary edema*                                                                                                                            | J81   |
| Pulmonary eosinophilia, not elsewhere classified                                                                                            | J82   |
| Tracheostomy complications*                                                                                                                 | J95.0 |
| Respiratory failure, not elsewhere classified*                                                                                              | J96   |
| Pulmonary collapse*                                                                                                                         | J98.1 |
| Respiratory disorders in diseases classified elsewhere                                                                                      | J99   |
| Interstitial emphysema and related conditions originating in the perinatal period                                                           | P25   |
| Pulmonary hemorrhage originating in perinatal period                                                                                        | P26   |
| Chronic respiratory disease originating in the perinatal period                                                                             | P27   |
| Other respiratory conditions originating in perinatal period                                                                                | P28   |
| Congenital malformations of lung                                                                                                            | Q33   |
| Complications of heart-lung transplant                                                                                                      | T86.3 |
| Complications of lung transplant                                                                                                            | T86.8 |
| Lung transplant status                                                                                                                      | Z94.2 |
| <b>Heart disease</b>                                                                                                                        |       |
| Hypertensive heart disease                                                                                                                  | I11   |
| Hypertensive heart and chronic kidney disease                                                                                               | I13   |
| ST elevation (STEMI) and non-ST elevation (NSTEMI) myocardial infarction*                                                                   | I21   |
| Subsequent ST elevation (STEMI) and non-ST elevation (NSTEMI) myocardial infarction                                                         | I22   |
| Certain current complications following ST elevation (STEMI) and non-ST elevation (NSTEMI) myocardial infarction (within the 28 day period) | I23   |
| Other acute ischemic heart diseases*                                                                                                        | I24   |
| Chronic ischemic heart disease                                                                                                              | I25   |
| Other pulmonary heart diseases                                                                                                              | I27   |
| Cardiomyopathy                                                                                                                              | I42   |
| Cardiomyopathy in diseases classified elsewhere                                                                                             | I43   |
| Cardiac arrest*                                                                                                                             | I46   |
| Heart transplant status                                                                                                                     | Z94.1 |

**eTable 1.** List of *ICD-10-CM* and Procedure Codes for Underlying Medical Conditions

|                                                                                    |        |
|------------------------------------------------------------------------------------|--------|
| Presence of cardiac and vascular implants and grafts                               | Z95    |
| Coronary angioplasty status                                                        | Z98.61 |
| Heart failure                                                                      | I50    |
| Rheumatic fever with heart involvement                                             | I01    |
| Rheumatic chorea                                                                   | I02    |
| Rheumatic mitral valve diseases                                                    | I05    |
| Rheumatic aortic valve diseases                                                    | I06    |
| Rheumatic tricuspid valve diseases                                                 | I07    |
| Multiple valve diseases                                                            | I08    |
| Other rheumatic heart diseases                                                     | I09    |
| Pulmonary embolism*                                                                | I26    |
| Other diseases of pulmonary vessels                                                | I28    |
| Other diseases of pericardium                                                      | I31    |
| Nonrheumatic mitral valve disorders                                                | I34    |
| Nonrheumatic aortic valve disorders                                                | I35    |
| Nonrheumatic tricuspid valve disorders                                             | I36    |
| Nonrheumatic pulmonary valve disorders                                             | I37    |
| Myocarditis in diseases classified elsewhere                                       | I41    |
| Atrioventricular and left bundle-branch block*                                     | I44    |
| Atrial fibrillation and flutter*                                                   | I48    |
| Complications and ill-defined descriptions of heart disease                        | I51    |
| Other heart disorders in diseases classified elsewhere                             | I52    |
| Aortic aneurysm and dissection*                                                    | I71    |
| Other aneurysm*                                                                    | I72    |
| Other peripheral vascular diseases                                                 | I73    |
| Arterial embolism and thrombosis*                                                  | I74    |
| Atheroembolism*                                                                    | I75    |
| Disorders of arteries, arterioles and capillaries in diseases classified elsewhere | I79    |
| Postcardiotomy syndrome                                                            | I97.0  |
| Other postprocedural cardiac functional disturbances                               | I97.1  |
| Other necrotizing vasculopathies                                                   | M31    |
| Congenital malformations of cardiac chambers and connections                       | Q20    |
| Congenital malformations of cardiac septa                                          | Q21    |

**eTable 1.** List of *ICD-10-CM* and Procedure Codes for Underlying Medical Conditions

|                                                                        |       |
|------------------------------------------------------------------------|-------|
| Congenital malformations of pulmonary and tricuspid valves             | Q22   |
| Congenital malformations of aortic and mitral valves                   | Q23   |
| Other congenital malformations of heart                                | Q24   |
| Congenital malformations of great arteries                             | Q25   |
| Congenital malformations of great veins                                | Q26   |
| Congenital absence and hypoplasia of umbilical artery                  | Q27.0 |
| Arteriovenous malformation (peripheral)                                | Q27.3 |
| Congenital phlebectasia                                                | Q27.4 |
| Other specified congenital malformations of peripheral vascular system | Q27.8 |
| Congenital malformation of peripheral vascular system, unspecified     | Q27.9 |
| Other congenital malformations of circulatory system                   | Q28   |
| Situs inversus                                                         | Q89.3 |
| <b>Hypertension</b>                                                    |       |
| Essential (primary) hypertension                                       | I10   |
| <b>Sickle cell and thalassemia</b>                                     |       |
| Alpha thalassemia                                                      | D56.0 |
| Beta thalassemia                                                       | D56.1 |
| Delta-beta thalassemia                                                 | D56.2 |
| Hemoglobin E-beta thalassemia                                          | D56.5 |
| Thalassemia, unspecified                                               | D56.9 |
| Hb-SS disease with crisis                                              | D57.0 |
| Sickle-cell disease without crisis                                     | D57.1 |
| Sickle-cell/Hb-C disease                                               | D57.2 |
| Sickle-cell thalassemia                                                | D57.4 |
| Other sickle-cell disorders                                            | D57.8 |
| <b>Cancer</b>                                                          |       |
| Malignant neoplasm of lip                                              | C00   |
| Malignant neoplasm of base of tongue                                   | C01   |
| Malignant neoplasm of other and unspecified parts of tongue            | C02   |
| Malignant neoplasm of gum                                              | C03   |
| Malignant neoplasm of floor of mouth                                   | C04   |
| Malignant neoplasm of palate                                           | C05   |
| Malignant neoplasm of other and unspecified parts of mouth             | C06   |

**eTable 1.** List of *ICD-10-CM* and Procedure Codes for Underlying Medical Conditions

|                                                                                                      |     |
|------------------------------------------------------------------------------------------------------|-----|
| Malignant neoplasm of parotid gland                                                                  | C07 |
| Malignant neoplasm of other and unspecified major salivary glands                                    | C08 |
| Malignant neoplasm of tonsil                                                                         | C09 |
| Malignant neoplasm of oropharynx                                                                     | C10 |
| Malignant neoplasm of nasopharynx                                                                    | C11 |
| Malignant neoplasm of pyriform sinus                                                                 | C12 |
| Malignant neoplasm of hypopharynx                                                                    | C13 |
| Malignant neoplasm of other and ill-defined sites in the lip, oral cavity and pharynx                | C14 |
| Malignant neoplasm of esophagus                                                                      | C15 |
| Malignant neoplasm of stomach                                                                        | C16 |
| Malignant neoplasm of small intestine                                                                | C17 |
| Malignant neoplasm of colon                                                                          | C18 |
| Malignant neoplasm of rectosigmoid junction                                                          | C19 |
| Malignant neoplasm of rectum                                                                         | C20 |
| Malignant neoplasm of anus and anal canal                                                            | C21 |
| Malignant neoplasm of liver and intrahepatic bile ducts                                              | C22 |
| Malignant neoplasm of gallbladder                                                                    | C23 |
| Malignant neoplasm of other and unspecified parts of biliary tract                                   | C24 |
| Malignant neoplasm of pancreas                                                                       | C25 |
| Malignant neoplasm of other and ill-defined digestive organs                                         | C26 |
| Malignant neoplasm of nasal cavity and middle ear                                                    | C30 |
| Malignant neoplasm of accessory sinuses                                                              | C31 |
| Malignant neoplasm of larynx                                                                         | C32 |
| Malignant neoplasm of trachea                                                                        | C33 |
| Malignant neoplasm of bronchus and lung                                                              | C34 |
| Malignant neoplasm of thymus                                                                         | C37 |
| Malignant neoplasm of heart, mediastinum and pleura                                                  | C38 |
| Malignant neoplasm of other and ill-defined sites in the respiratory system and intrathoracic organs | C39 |
| Malignant neoplasm of bone and articular cartilage of limbs                                          | C40 |
| Malignant neoplasm of bone and articular cartilage of other and unspecified sites                    | C41 |
| Malignant melanoma of skin                                                                           | C43 |
| Other and unspecified malignant neoplasm of skin                                                     | C44 |
| Mesothelioma                                                                                         | C45 |

**eTable 1.** List of *ICD-10-CM* and Procedure Codes for Underlying Medical Conditions

|                                                                                             |     |
|---------------------------------------------------------------------------------------------|-----|
| Kaposi's sarcoma                                                                            | C46 |
| Malignant neoplasm of peripheral nerves and autonomic nervous system                        | C47 |
| Malignant neoplasm of retroperitoneum and peritoneum                                        | C48 |
| Malignant neoplasm of other connective and soft tissue                                      | C49 |
| Merkel cell carcinoma                                                                       | C4A |
| Malignant neoplasms of breast                                                               | C50 |
| Malignant neoplasm of vulva                                                                 | C51 |
| Malignant neoplasm of vagina                                                                | C52 |
| Malignant neoplasm of cervix uteri                                                          | C53 |
| Malignant neoplasm of corpus uteri                                                          | C54 |
| Malignant neoplasm of uterus, part unspecified                                              | C55 |
| Malignant neoplasm of ovary                                                                 | C56 |
| Malignant neoplasm of other and unspecified female genital organs                           | C57 |
| Malignant neoplasm of placenta                                                              | C58 |
| Malignant neoplasm of penis                                                                 | C60 |
| Malignant neoplasm of prostate                                                              | C61 |
| Malignant neoplasm of testis                                                                | C62 |
| Malignant neoplasm of other and unspecified male genital organs                             | C63 |
| Malignant neoplasm of kidney, except renal pelvis                                           | C64 |
| Malignant neoplasm of renal pelvis                                                          | C65 |
| Malignant neoplasm of ureter                                                                | C66 |
| Malignant neoplasm of bladder                                                               | C67 |
| Malignant neoplasm of other and unspecified urinary organs                                  | C68 |
| Malignant neoplasm of eye and adnexa                                                        | C69 |
| Malignant neoplasm of meninges                                                              | C70 |
| Malignant neoplasm of brain                                                                 | C71 |
| Malignant neoplasm of spinal cord, cranial nerves and other parts of central nervous system | C72 |
| Malignant neoplasm of thyroid gland                                                         | C73 |
| Malignant neoplasm of adrenal gland                                                         | C74 |
| Malignant neoplasm of other endocrine glands and related structures                         | C75 |
| Malignant neoplasm of other and ill-defined sites                                           | C76 |
| Secondary and unspecified malignant neoplasm of lymph nodes                                 | C77 |
| Secondary malignant neoplasm of respiratory and digestive organs                            | C78 |

**eTable 1.** List of *ICD-10-CM* and Procedure Codes for Underlying Medical Conditions

|                                                                                         |        |
|-----------------------------------------------------------------------------------------|--------|
| Secondary malignant neoplasm of other and unspecified sites                             | C79    |
| Malignant neuroendocrine tumors                                                         | C7A    |
| Secondary neuroendocrine tumors                                                         | C7B    |
| Malignant neoplasm without specification of site                                        | C80    |
| Hodgkin lymphoma                                                                        | C81    |
| Follicular lymphoma                                                                     | C82    |
| Non-follicular lymphoma                                                                 | C83    |
| Mature T/NK-cell lymphomas                                                              | C84    |
| Other specified and unspecified types of non-Hodgkin lymphoma                           | C85    |
| Other specified types of T/NK-cell lymphoma                                             | C86    |
| Malignant immunoproliferative diseases and certain other B-cell lymphomas               | C88    |
| Multiple myeloma and malignant plasma cell neoplasms                                    | C90    |
| Lymphoid leukemia                                                                       | C91    |
| Myeloid leukemia                                                                        | C92    |
| Monocytic leukemia                                                                      | C93    |
| Other leukemias of specified cell type                                                  | C94    |
| Leukemia of unspecified cell type                                                       | C95    |
| Other and unspecified malignant neoplasms of lymphoid, hematopoietic and related tissue | C96    |
| Melanoma in situ                                                                        | D03    |
| Myelodysplastic syndromes                                                               | D46    |
| <b>Cerebrovascular diseases</b>                                                         |        |
| Nontraumatic subarachnoid hemorrhage*                                                   | I60    |
| Nontraumatic intracerebral hemorrhage*                                                  | I61    |
| Other and unspecified nontraumatic intracranial hemorrhage*                             | I62    |
| Cerebral infarction*                                                                    | I63    |
| Other cerebrovascular diseases                                                          | I67    |
| Cerebrovascular disorders in diseases classified elsewhere                              | I68    |
| Sequelae of cerebrovascular disease                                                     | I69    |
| <b>Neurological/Musculoskeletal</b>                                                     |        |
| Tay-Sachs disease                                                                       | E75.02 |
| Other gangliosidosis                                                                    | E75.19 |
| Neuronal ceroid lipofuscinosis                                                          | E75.4  |
| Vascular dementia                                                                       | F01    |



**eTable 1.** List of *ICD-10-CM* and Procedure Codes for Underlying Medical Conditions

|                                                                                                |       |
|------------------------------------------------------------------------------------------------|-------|
| Dementia in other diseases classified elsewhere                                                | F02   |
| Unspecified dementia                                                                           | F03   |
| Moderate intellectual disabilities                                                             | F71   |
| Severe intellectual disabilities                                                               | F72   |
| Profound intellectual disabilities                                                             | F73   |
| Rett's syndrome                                                                                | F84.2 |
| Huntington's disease                                                                           | G10   |
| Hereditary ataxia                                                                              | G11   |
| Spinal muscular atrophy and related syndromes                                                  | G12   |
| Systemic atrophies primarily affecting central nervous system in diseases classified elsewhere | G13   |
| Postpolio syndrome                                                                             | G14   |
| Parkinson's disease                                                                            | G20   |
| Secondary parkinsonism                                                                         | G21   |
| Other degenerative diseases of basal ganglia                                                   | G23   |
| Dystonia                                                                                       | G24   |
| Other extrapyramidal and movement disorders                                                    | G25   |
| Extrapyramidal and movement disorders in diseases classified elsewhere                         | G26   |
| Alzheimer's disease                                                                            | G30   |
| Other degenerative diseases of nervous system, not elsewhere classified                        | G31   |
| Other degenerative disorders of nervous system in diseases classified elsewhere                | G32   |
| Multiple sclerosis                                                                             | G35   |
| Other acute disseminated demyelination                                                         | G36   |
| Other demyelinating diseases of central nervous system                                         | G37   |
| Epilepsy and recurrent seizures                                                                | G40   |
| Transient cerebral ischemic attacks and related syndromes*                                     | G45   |
| Vascular syndromes of brain in cerebrovascular diseases                                        | G46   |
| Hereditary and idiopathic neuropathy                                                           | G60   |
| Inflammatory polyneuropathy                                                                    | G61   |
| Other and unspecified polyneuropathies                                                         | G62   |
| Polyneuropathy in diseases classified elsewhere                                                | G63   |
| Other disorders of peripheral nervous system                                                   | G64   |
| Myasthenia gravis and other myoneural disorders                                                | G70   |
| Primary disorders of muscles                                                                   | G71   |

**eTable 1.** List of *ICD-10-CM* and Procedure Codes for Underlying Medical Conditions

|                                                                                  |        |
|----------------------------------------------------------------------------------|--------|
| Disorders of myoneural junction and muscle in diseases classified elsewhere      | G73    |
| Cerebral palsy                                                                   | G80    |
| Hemiplegia and hemiparesis                                                       | G81    |
| Paraplegia (paraparesis) and quadriplegia (quadriparesis)                        | G82    |
| Other paralytic syndromes                                                        | G83    |
| Multi-system degeneration of the autonomic nervous system                        | G90.3  |
| Hydrocephalus                                                                    | G91    |
| Other disorders of brain                                                         | G93    |
| Other disorders of brain in diseases classified elsewhere                        | G94    |
| Other and unspecified diseases of spinal cord                                    | G95    |
| Myelopathy in diseases classified elsewhere                                      | G99.2  |
| Kearns-Sayre syndrome                                                            | H49.81 |
| Chronic postrheumatic arthropathy (Jaccoud)                                      | M12.0  |
| Dermato(poly)myositis in neoplastic disease                                      | M36.0  |
| Other disturbances of cerebral status of newborn                                 | P91    |
| Anencephaly and similar malformations                                            | Q00    |
| Encephalocele                                                                    | Q01    |
| Microcephaly                                                                     | Q02    |
| Congenital hydrocephalus                                                         | Q03    |
| Other congenital malformations of brain                                          | Q04    |
| Spina bifida                                                                     | Q05    |
| Other congenital malformations of the spinal cord                                | Q06    |
| Other congenital malformations of nervous system                                 | Q07    |
| Congenital malformations of spine and bony thorax                                | Q76    |
| Osteochondrodysplasia with defects of growth of tubular bones and spine          | Q77    |
| Other osteochondrodysplasias                                                     | Q78    |
| Congenital malformations of musculoskeletal system, not elsewhere classified     | Q79    |
| Phakomatoses, not elsewhere classified                                           | Q85    |
| Marfan's syndrome                                                                | Q87.4  |
| Trisomy 18 and Trisomy 13                                                        | Q91    |
| Other trisomies and partial trisomies of the autosomes, not elsewhere classified | Q92    |
| Monosomies and deletions from the autosomes, not elsewhere classified            | Q93    |
| Turner's syndrome                                                                | Q96    |

**eTable 1.** List of *ICD-10-CM* and Procedure Codes for Underlying Medical Conditions

|                                                                      |               |
|----------------------------------------------------------------------|---------------|
| Other symptoms and signs involving cognitive functions and awareness | R41           |
| Functional quadriplegia                                              | R53.2         |
| Age-related physical debility/frailty                                | R54           |
| <b>Down syndrome</b>                                                 |               |
| Down syndrome                                                        | Q90           |
| <b>Diabetes</b>                                                      |               |
| Diabetes mellitus due to underlying condition                        | E08           |
| Type 1 diabetes mellitus                                             | E10           |
| Type 2 diabetes mellitus                                             | E11           |
| Other specified diabetes mellitus                                    | E13           |
| <b>Overweight</b>                                                    |               |
| Overweight                                                           | E66.3         |
| Body mass index (BMI) overweight, 25–29.9                            | Z68.25–Z68.29 |
| <b>Obesity</b>                                                       |               |
| Other obesity due to excess calories                                 | E66.09        |
| Drug-induced obesity                                                 | E66.1         |
| Other obesity                                                        | E66.8         |
| Body mass index (BMI) obese, 30–39                                   | Z68.3         |
| Obesity, unspecified                                                 | E66.9         |
| <b>Severe obesity</b>                                                |               |
| Morbid (severe) obesity due to excess calories                       | E66.01        |
| Morbid obesity with alveolar hypoventilation (pickwickian syndrome)  | E66.2         |
| Body mass index (BMI) 40 or greater, adult                           | Z68.4         |
| <b>Liver diseases</b>                                                |               |
| Chronic viral hepatitis                                              | B18           |
| Portal vein thrombosis*                                              | I81           |
| Esophageal varices                                                   | I85           |
| Alcoholic liver disease                                              | K70           |
| Toxic liver disease                                                  | K71           |
| Hepatic failure, not elsewhere classified                            | K72           |
| Chronic hepatitis, not elsewhere classified                          | K73           |
| Fibrosis and cirrhosis of liver                                      | K74           |
| Other inflammatory liver diseases                                    | K75           |

**eTable 1.** List of *ICD-10-CM* and Procedure Codes for Underlying Medical Conditions

|                                                                          |        |
|--------------------------------------------------------------------------|--------|
| Other diseases of liver                                                  | K76    |
| Liver disorders in diseases classified elsewhere                         | K77    |
| <b>Chronic kidney disease including dialysis</b>                         |        |
| Hypertensive chronic kidney disease                                      | I12    |
| Chronic kidney disease                                                   | N18    |
| Encounter for care involving renal dialysis                              | Z49    |
| Patient's noncompliance with renal dialysis                              | Z91.15 |
| Kidney transplant status                                                 | Z94.0  |
| Dependence on renal dialysis                                             | Z99.2  |
| Rapidly progressive nephritic syndrome                                   | N01    |
| Recurrent and persistent hematuria                                       | N02    |
| Chronic nephritic syndrome                                               | N03    |
| Nephrotic syndrome                                                       | N04    |
| Unspecified nephritic syndrome                                           | N05    |
| Isolated proteinuria with specified morphological lesion                 | N06    |
| Hereditary nephropathy, not elsewhere defined                            | N07    |
| Glomerular disorders in diseases classified elsewhere                    | N08    |
| Chronic tubulo-interstitial nephritis                                    | N11    |
| Drug- and heavy-metal-induced tubulo-interstitial and tubular conditions | N14    |
| Other renal tubulo-interstitial diseases                                 | N15    |
| Renal tubulo-interstitial disorders in diseases classified elsewhere     | N16    |
| Disorders resulting from impaired renal tubular function                 | N25    |
| Unspecified contracted kidney                                            | N26    |
| Other disorders of kidney and ureter, not elsewhere classified           | N28    |
| Congenital renal artery stenosis                                         | Q27.1  |
| Other congenital malformations of renal artery                           | Q27.2  |
| Renal agenesis and other reduction defects of kidney                     | Q60    |
| <b>Immunosuppression</b>                                                 |        |
| Human immunodeficiency virus (HIV) disease                               | B20    |
| Pneumocystosis                                                           | B59    |
| Retrovirus as the cause of diseases classified elsewhere                 | B97.3  |
| Post-transplant lymphoproliferative disorder (PTLD)                      | D47.Z1 |
| Neutropenia (including agranulocytosis)                                  | D70    |

**eTable 1.** List of *ICD-10-CM* and Procedure Codes for Underlying Medical Conditions

|                                                                                               |        |
|-----------------------------------------------------------------------------------------------|--------|
| Functional disorders of polymorphonuclear neutrophils                                         | D71    |
| Other disorders of white blood cells                                                          | D72    |
| Diseases of spleen                                                                            | D73    |
| Other specified diseases with participation of lymphoreticular and reticulohistiocytic tissue | D76    |
| Immunodeficiency with predominantly antibody defects                                          | D80    |
| Combined immunodeficiencies                                                                   | D81    |
| Immunodeficiency associated with other major defects                                          | D82    |
| Common variable immunodeficiency                                                              | D83    |
| Other immunodeficiencies                                                                      | D84    |
| Other disorders involving the immune mechanism, not elsewhere classified                      | D89    |
| Rheumatoid arthritis with rheumatoid factor                                                   | M05    |
| Other rheumatoid arthritis                                                                    | M06    |
| Enteropathic arthropathies                                                                    | M07    |
| Juvenile arthritis                                                                            | M08    |
| Polyarteritis nodosa and related conditions                                                   | M30    |
| Other necrotizing vasculopathies                                                              | M31    |
| Systemic lupus erythematosus (SLE)                                                            | M32    |
| Dermatopolymyositis                                                                           | M33    |
| Systemic sclerosis (scleroderma)                                                              | M34    |
| Sicca syndrome (Sjögren)                                                                      | M35.0  |
| Systemic involvement of connective tissue, unspecified                                        | M35.9  |
| Congenital absence and malformations of spleen                                                | Q89.0  |
| Asymptomatic human immunodeficiency virus (HIV) infection status                              | Z21    |
| Encounter for aftercare following organ transplant                                            | Z48.2  |
| Encounter for antineoplastic radiation therapy                                                | Z51.0  |
| Encounter for antineoplastic chemotherapy and immunotherapy                                   | Z51.1  |
| Transplanted organ and tissue status                                                          | Z94    |
| Long term (current) use of steroids                                                           | Z79.5  |
| Transplant complication                                                                       | T86    |
| <b>Substance use disorder</b>                                                                 |        |
| Alcohol abuse, uncomplicated                                                                  | F10.10 |
| Alcohol abuse with intoxication                                                               | F10.12 |
| Alcohol abuse with alcohol-induced mood disorder                                              | F10.14 |

**eTable 1.** List of *ICD-10-CM* and Procedure Codes for Underlying Medical Conditions

|                                                                            |        |
|----------------------------------------------------------------------------|--------|
| Alcohol abuse with alcohol-induced psychotic disorder                      | F10.15 |
| Alcohol abuse with other alcohol-induced disorders                         | F10.18 |
| Alcohol abuse with unspecified alcohol-induced disorder                    | F10.19 |
| Alcohol dependence, uncomplicated                                          | F10.20 |
| Alcohol dependence, in remission                                           | F10.21 |
| Alcohol dependence with intoxication                                       | F10.22 |
| Alcohol dependence with withdrawal                                         | F10.23 |
| Alcohol dependence with alcohol-induced mood disorder                      | F10.24 |
| Alcohol dependence with alcohol-induced psychotic disorder                 | F10.25 |
| Alcohol dependence with alcohol-induced persisting amnestic disorder       | F10.26 |
| Alcohol dependence with alcohol-induced persisting dementia                | F10.27 |
| Alcohol dependence with other alcohol-induced disorders                    | F10.28 |
| Alcohol dependence with unspecified alcohol-induced disorder               | F10.29 |
| Alcohol use, unspecified with intoxication                                 | F10.92 |
| Alcohol use, unspecified with withdrawal                                   | F10.93 |
| Alcohol use, unspecified with alcohol-induced mood disorder                | F10.94 |
| Alcohol use, unspecified with alcohol-induced psychotic disorder           | F10.95 |
| Alcohol use, unspecified with alcohol-induced persisting amnestic disorder | F10.96 |
| Alcohol use, unspecified with alcohol-induced persisting dementia          | F10.97 |
| Alcohol use, unspecified with other alcohol-induced disorders              | F10.98 |
| Alcohol use, unspecified with unspecified alcohol-induced disorder         | F10.99 |
| Opioid abuse, uncomplicated                                                | F11.10 |
| Opioid abuse with intoxication                                             | F11.12 |
| Opioid abuse with opioid-induced mood disorder                             | F11.14 |
| Opioid abuse with opioid-induced psychotic disorder                        | F11.15 |
| Opioid abuse with other opioid-induced disorder                            | F11.18 |
| Opioid abuse with unspecified opioid-induced disorder                      | F11.19 |
| Opioid dependence                                                          | F11.2  |
| Opioid use, unspecified                                                    | F11.9  |
| Cannabis abuse, uncomplicated                                              | F12.10 |
| Cannabis abuse with intoxication                                           | F12.12 |
| Cannabis abuse with psychotic disorder                                     | F12.15 |
| Cannabis abuse with other cannabis-induced disorder                        | F12.18 |

**eTable 1.** List of *ICD-10-CM* and Procedure Codes for Underlying Medical Conditions

|                                                                                                           |         |
|-----------------------------------------------------------------------------------------------------------|---------|
| Cannabis abuse with unspecified cannabis-induced disorder                                                 | F12.19  |
| Cannabis dependence, uncomplicated                                                                        | F12.20  |
| Cannabis dependence, in remission                                                                         | F12.21  |
| Cannabis dependence with intoxication                                                                     | F12.22  |
| Cannabis dependence with withdrawal                                                                       | F12.23  |
| Cannabis dependence with psychotic disorder                                                               | F12.25  |
| Cannabis dependence with other cannabis-induced disorder                                                  | F12.28  |
| Cannabis dependence with unspecified cannabis-induced disorder                                            | F12.29  |
| Cannabis use, unspecified, uncomplicated                                                                  | F12.90  |
| Cannabis use, unspecified with intoxication                                                               | F12.92  |
| Cannabis use, unspecified with withdrawal                                                                 | F12.93  |
| Cannabis use, unspecified with psychotic disorder                                                         | F12.95  |
| Cannabis use, unspecified with other cannabis-induced disorder                                            | F12.98  |
| Cannabis use, unspecified with unspecified cannabis-induced disorder                                      | F12.99  |
| Sedative, hypnotic or anxiolytic abuse, uncomplicated                                                     | F13.10  |
| Sedative, hypnotic or anxiolytic abuse with intoxication                                                  | F13.12  |
| Sedative, hypnotic or anxiolytic abuse with sedative, hypnotic or anxiolytic-induced mood disorder        | F13.14  |
| Sedative, hypnotic or anxiolytic abuse with sedative, hypnotic or anxiolytic-induced psychotic disorder   | F13.15  |
| Sedative, hypnotic or anxiolytic abuse with other sedative, hypnotic or anxiolytic-induced disorders      | F13.18  |
| Sedative, hypnotic or anxiolytic abuse with unspecified sedative, hypnotic or anxiolytic-induced disorder | F13.19  |
| Sedative, hypnotic or anxiolytic-related dependence                                                       | F13.2   |
| Sedative, hypnotic or anxiolytic-related use, unspecified                                                 | F13.9   |
| Cocaine abuse, uncomplicated                                                                              | F14.10  |
| Cocaine abuse with intoxication                                                                           | F14.12  |
| Cocaine abuse with cocaine-induced mood disorder                                                          | F14.14  |
| Cocaine abuse with cocaine-induced psychotic disorder                                                     | F14.15  |
| Cocaine abuse with other cocaine-induced disorder                                                         | F14.18  |
| Cocaine abuse with unspecified cocaine-induced disorder                                                   | F14.19  |
| Cocaine dependence, uncomplicated                                                                         | F14.20  |
| Cocaine dependence, in remission                                                                          | F14.21  |
| Cocaine dependence with intoxication, uncomplicated                                                       | F14.220 |
| Cocaine dependence with intoxication delirium                                                             | F14.221 |
| Cocaine dependence with intoxication with perceptual disturbance                                          | F14.222 |

**eTable 1.** List of *ICD-10-CM* and Procedure Codes for Underlying Medical Conditions

|                                                                        |         |
|------------------------------------------------------------------------|---------|
| Cocaine dependence with intoxication, unspecified                      | F14.229 |
| Cocaine dependence with withdrawal                                     | F14.23  |
| Cocaine dependence with cocaine-induced mood disorder                  | F14.24  |
| Cocaine dependence with cocaine-induced psychotic disorder             | F14.25  |
| Cocaine dependence with other cocaine-induced disorder                 | F14.28  |
| Cocaine dependence with unspecified cocaine-induced disorder           | F14.29  |
| Cocaine use, unspecified, uncomplicated                                | F14.90  |
| Cocaine use, unspecified with intoxication                             | F14.92  |
| Cocaine use, unspecified with withdrawal                               | F14.93  |
| Cocaine use, unspecified with cocaine-induced mood disorder            | F14.94  |
| Cocaine use, unspecified with cocaine-induced psychotic disorder       | F14.95  |
| Cocaine use, unspecified with other specified cocaine-induced disorder | F14.98  |
| Cocaine use, unspecified with unspecified cocaine-induced disorder     | F14.99  |
| Other stimulant abuse, uncomplicated                                   | F15.10  |
| Other stimulant abuse with intoxication                                | F15.12  |
| Other stimulant abuse with stimulant-induced mood disorder             | F15.14  |
| Other stimulant abuse with stimulant-induced psychotic disorder        | F15.15  |
| Other stimulant abuse with other stimulant-induced disorder            | F15.18  |
| Other stimulant abuse with unspecified stimulant-induced disorder      | F15.19  |
| Other stimulant dependence                                             | F15.2   |
| Other stimulant use, unspecified                                       | F15.9   |
| Hallucinogen abuse, uncomplicated                                      | F16.10  |
| Hallucinogen abuse with intoxication                                   | F16.12  |
| Hallucinogen abuse with hallucinogen-induced mood disorder             | F16.14  |
| Hallucinogen abuse with hallucinogen-induced psychotic disorder        | F16.15  |
| Hallucinogen abuse with other hallucinogen-induced disorder            | F16.18  |
| Hallucinogen abuse with unspecified hallucinogen-induced disorder      | F16.19  |
| Hallucinogen dependence                                                | F16.2   |
| Hallucinogen use, unspecified                                          | F16.9   |
| Inhalant abuse, uncomplicated                                          | F18.10  |
| Inhalant abuse with intoxication                                       | F18.12  |
| Inhalant abuse with inhalant-induced mood disorder                     | F18.14  |
| Inhalant abuse with inhalant-induced psychotic disorder                | F18.15  |



**eTable 1.** List of *ICD-10-CM* and Procedure Codes for Underlying Medical Conditions

|                                                                                                          |                                                                                           |
|----------------------------------------------------------------------------------------------------------|-------------------------------------------------------------------------------------------|
| Inhalant abuse with inhalant-induced dementia                                                            | F18.17                                                                                    |
| Inhalant abuse with other inhalant-induced disorders                                                     | F18.18                                                                                    |
| Inhalant abuse with unspecified inhalant-induced disorder                                                | F18.19                                                                                    |
| Inhalant dependence                                                                                      | F18.2                                                                                     |
| Inhalant use, unspecified                                                                                | F18.9                                                                                     |
| Other psychoactive substance abuse, uncomplicated                                                        | F19.10                                                                                    |
| Other psychoactive substance abuse with intoxication                                                     | F19.12                                                                                    |
| Other psychoactive substance abuse with psychoactive substance-induced mood disorder                     | F19.14                                                                                    |
| Other psychoactive substance abuse with psychoactive substance-induced psychotic disorder                | F19.15                                                                                    |
| Other psychoactive substance abuse with psychoactive substance-induced persisting amnestic disorder      | F19.16                                                                                    |
| Other psychoactive substance abuse with psychoactive substance-induced persisting dementia               | F19.17                                                                                    |
| Other psychoactive substance abuse with other psychoactive substance-induced disorders                   | F19.18                                                                                    |
| Other psychoactive substance abuse with unspecified psychoactive substance-induced disorder              | F19.19                                                                                    |
| Other psychoactive substance dependence, uncomplicated                                                   | F19.20                                                                                    |
| Other psychoactive substance dependence, in remission                                                    | F19.21                                                                                    |
| Other psychoactive substance dependence with intoxication                                                | F19.22                                                                                    |
| Other psychoactive substance dependence with withdrawal                                                  | F19.23                                                                                    |
| Other psychoactive substance dependence with psychoactive substance-induced mood disorder                | F19.24                                                                                    |
| Other psychoactive substance dependence with psychoactive substance-induced psychotic disorder           | F19.25                                                                                    |
| Other psychoactive substance dependence with psychoactive substance-induced persisting amnestic disorder | F19.26                                                                                    |
| Other psychoactive substance dependence with psychoactive substance-induced persisting dementia          | F19.27                                                                                    |
| Other psychoactive substance dependence with other psychoactive substance-induced disorders              | F19.28                                                                                    |
| Other psychoactive substance dependence with unspecified psychoactive substance-induced disorder         | F19.29                                                                                    |
| Other psychoactive substance use, unspecified                                                            | F19.9                                                                                     |
| <b>Tobacco use and smoking</b>                                                                           |                                                                                           |
| Tobacco use                                                                                              | Z72.0                                                                                     |
| Personal history of nicotine dependence                                                                  | Z87.891                                                                                   |
| Nicotine dependence                                                                                      | F17                                                                                       |
| Tobacco use disorder complicating pregnancy                                                              | O99.33                                                                                    |
| Toxic effect of tobacco and nicotine                                                                     | T65.2                                                                                     |
| Procedure codes for smoking and tobacco use cessation                                                    | CPT†: 99406, 99407, G0375, G0376, G0436, G0437, G8402, G8403, G8453, G8454, S4990, S4991, |

**eTable 1.** List of *ICD-10-CM* and Procedure Codes for Underlying Medical Conditions

|                                                                                         |                                   |
|-----------------------------------------------------------------------------------------|-----------------------------------|
|                                                                                         | S4995, S9075, S9453, 4000F, 4001F |
| <b>Serious mental illness</b>                                                           |                                   |
| Schizophrenia                                                                           | F20                               |
| Schizoaffective disorders                                                               | F25                               |
| Bipolar disorders                                                                       | F31                               |
| Severe major depression                                                                 | F32.2, F32.3, F33.2, F33.3        |
| <b>Disability</b>                                                                       |                                   |
| Barth syndrome                                                                          | E78.71                            |
| Smith-Lemli-Opitz syndrome                                                              | E78.72                            |
| Mild intellectual disabilities                                                          | F70                               |
| Moderate intellectual disabilities                                                      | F71                               |
| Severe intellectual disabilities                                                        | F72                               |
| Profound intellectual disabilities                                                      | F73                               |
| Other intellectual disabilities                                                         | F78                               |
| Unspecified intellectual disabilities                                                   | F79                               |
| Specific developmental disorders of speech and language                                 | F80                               |
| Specific developmental disorders of scholastic skills                                   | F81                               |
| Specific developmental disorder of motor function                                       | F82                               |
| Autistic disorder                                                                       | F84.0                             |
| Other childhood disintegrative disorder                                                 | F84.3                             |
| Asperger's syndrome                                                                     | F84.5                             |
| Other pervasive developmental disorders                                                 | F84.8                             |
| Pervasive developmental disorder, unspecified                                           | F84.9                             |
| Tropical spastic paraplegia                                                             | G04.1                             |
| Hereditary spastic paraplegia                                                           | G11.4                             |
| Mild cognitive impairment, so stated                                                    | G31.84                            |
| Hemiplegia and hemiparesis                                                              | G81                               |
| Paraplegia (paraparesis) and quadriplegia (quadriparesis)                               | G82                               |
| Other paralytic syndromes                                                               | G83                               |
| Visual disturbances                                                                     | H53                               |
| Blindness and low vision                                                                | H54                               |
| Conductive hearing loss, unilateral with unrestricted hearing on the contralateral side | H90.1                             |

**eTable 1.** List of *ICD-10-CM* and Procedure Codes for Underlying Medical Conditions

|                                                                                                                 |        |
|-----------------------------------------------------------------------------------------------------------------|--------|
| Sensorineural hearing loss, bilateral                                                                           | H90.3  |
| Sensorineural hearing loss, unilateral with unrestricted hearing on the contralateral side                      | H90.4  |
| Unspecified sensorineural hearing loss                                                                          | H90.5  |
| Mixed conductive and sensorineural hearing loss, bilateral                                                      | H90.6  |
| Mixed conductive and sensorineural hearing loss, unilateral with unrestricted hearing on the contralateral side | H90.7  |
| Mixed conductive and sensorineural hearing loss, unspecified                                                    | H90.8  |
| Sensorineural hearing loss, unilateral, with restricted hearing on the contralateral side                       | H90.A2 |
| Mixed conductive and sensorineural hearing loss, unilateral with restricted hearing on the contralateral side   | H90.A3 |
| Ototoxic hearing loss                                                                                           | H91.0  |
| Deaf nonspeaking, not elsewhere classified                                                                      | H91.3  |
| Other specified hearing loss                                                                                    | H91.8  |
| Unspecified hearing loss                                                                                        | H91.9  |
| Central auditory processing disorder                                                                            | H93.25 |
| Monoplegia of upper limb following nontraumatic subarachnoid hemorrhage                                         | I69.03 |
| Monoplegia of lower limb following nontraumatic subarachnoid hemorrhage                                         | I69.04 |
| Hemiplegia and hemiparesis following nontraumatic subarachnoid hemorrhage                                       | I69.05 |
| Other paralytic syndrome following nontraumatic subarachnoid hemorrhage                                         | I69.06 |
| Monoplegia of upper limb following nontraumatic intracerebral hemorrhage                                        | I69.13 |
| Monoplegia of lower limb following nontraumatic intracerebral hemorrhage                                        | I69.14 |
| Hemiplegia and hemiparesis following nontraumatic intracerebral hemorrhage                                      | I69.15 |
| Other paralytic syndrome following nontraumatic intracerebral hemorrhage                                        | I69.16 |
| Monoplegia of upper limb following other nontraumatic intracranial hemorrhage                                   | I69.23 |
| Monoplegia of lower limb following other nontraumatic intracranial hemorrhage                                   | I69.24 |
| Hemiplegia and hemiparesis following other nontraumatic intracranial hemorrhage                                 | I69.25 |
| Other paralytic syndrome following other nontraumatic intracranial hemorrhage                                   | I69.26 |
| Monoplegia of upper limb following cerebral infarction                                                          | I69.33 |
| Monoplegia of lower limb following cerebral infarction                                                          | I69.34 |
| Hemiplegia and hemiparesis following cerebral infarction                                                        | I69.35 |
| Other paralytic syndrome following cerebral infarction                                                          | I69.36 |
| Monoplegia of upper limb following other cerebrovascular disease                                                | I69.83 |
| Monoplegia of lower limb following other cerebrovascular disease                                                | I69.84 |
| Hemiplegia and hemiparesis following other cerebrovascular disease                                              | I69.85 |
| Other paralytic syndrome following other cerebrovascular disease                                                | I69.86 |

**eTable 1.** List of *ICD-10-CM* and Procedure Codes for Underlying Medical Conditions

|                                                                                  |        |
|----------------------------------------------------------------------------------|--------|
| Monoplegia of upper limb following unspecified cerebrovascular disease           | I69.93 |
| Monoplegia of lower limb following unspecified cerebrovascular disease           | I69.94 |
| Hemiplegia and hemiparesis following unspecified cerebrovascular disease         | I69.95 |
| Other paralytic syndrome following unspecified cerebrovascular disease           | I69.96 |
| Newborn affected by maternal use of alcohol                                      | P04.3  |
| Fetal alcohol syndrome (dysmorphic)                                              | Q86.0  |
| Congenital malformation syndromes predominantly associated with short stature    | Q87.1  |
| Congenital malformation syndromes predominantly involving limbs                  | Q87.2  |
| Congenital malformation syndromes involving early overgrowth                     | Q87.3  |
| Other congenital malformation syndromes with other skeletal changes              | Q87.5  |
| Alport syndrome                                                                  | Q87.81 |
| Other specified congenital malformation syndromes, not elsewhere classified      | Q87.89 |
| Multiple congenital malformations, not elsewhere classified                      | Q89.7  |
| Other specified congenital malformations                                         | Q89.8  |
| Down syndrome                                                                    | Q90    |
| Trisomy 18 and Trisomy 13                                                        | Q91    |
| Other trisomies and partial trisomies of the autosomes, not elsewhere classified | Q92    |
| Whole chromosome monosomy, nonmosaicism (meiotic nondisjunction)                 | Q93.0  |
| Whole chromosome monosomy, mosaicism (mitotic nondisjunction)                    | Q93.1  |
| Chromosome replaced with ring, dicentric or isochromosome                        | Q93.2  |
| Deletion of short arm of chromosome 4                                            | Q93.3  |
| Deletion of short arm of chromosome 5                                            | Q93.4  |
| Other deletions of part of a chromosome                                          | Q93.5  |
| Deletions with other complex rearrangements                                      | Q93.7  |
| Velo-cardio-facial syndrome                                                      | Q93.81 |
| Other microdeletions                                                             | Q93.88 |
| Other deletions from the autosomes                                               | Q93.89 |
| Deletion from autosomes, unspecified                                             | Q93.9  |
| Balanced autosomal rearrangement in abnormal individual                          | Q95.2  |
| Balanced sex/autosomal rearrangement in abnormal individual                      | Q95.3  |
| Fragile X chromosome                                                             | Q99.2  |
| Abnormalities of gait and mobility                                               | R26    |
| Dyslexia and alexia                                                              | R48.0  |

**eTable 1.** List of *ICD-10-CM* and Procedure Codes for Underlying Medical Conditions

|                                                                                                                                                        |        |
|--------------------------------------------------------------------------------------------------------------------------------------------------------|--------|
| Limitation of activities due to disability                                                                                                             | Z73.6  |
| Dual sensory impairment                                                                                                                                | Z73.82 |
| Other reduced mobility                                                                                                                                 | Z74.09 |
| * These conditions were only considered underlying medical conditions if they were reported in an encounter that preceded the index COVID-19 encounter |        |
| †CPT = current procedural terminology                                                                                                                  |        |

**eTable 2.** List of *ICD-10-CM* and Procedure Codes for Acute Complications

| Respiratory |                                                                    |         |
|-------------|--------------------------------------------------------------------|---------|
|             | Pneumonia                                                          |         |
|             | Viral pneumonia                                                    | J12     |
|             | Streptococcus pneumoniae pneumonia                                 | J13     |
|             | Hemophilus influenzae pneumonia                                    | J14     |
|             | Other bacterial pneumonia                                          | J15     |
|             | Pneumonia due to other specified organism                          | J16     |
|             | Pneumonia in infectious diseases classified elsewhere              | J17     |
|             | Pneumonia, unspecified organism                                    | J18     |
|             | Abscess of lung with pneumonia                                     | J85.1   |
|             | Influenza due to identified novel influenza A virus with pneumonia | J09.X1  |
|             | Influenza due to other identified influenza virus with pneumonia   | J10.0   |
|             | Influenza due to unidentified influenza virus with pneumonia       | J11.0   |
|             | Respiratory failure                                                |         |
|             | Acute respiratory failure                                          | J96.0   |
|             | Acute and chronic respiratory failure                              | J96.2   |
|             | Respiratory arrest                                                 | R09.2   |
|             | Acute respiratory distress syndrome                                |         |
|             | Acute respiratory distress syndrome                                | J80     |
|             | Asthma exacerbation                                                |         |
|             | Mild intermittent asthma with acute exacerbation                   | J45.21  |
|             | Mild intermittent asthma with status asthmaticus                   | J45.22  |
|             | Mild persistent asthma with acute exacerbation                     | J45.31  |
|             | Mild persistent asthma with status asthmaticus                     | J45.32  |
|             | Moderate persistent asthma with acute exacerbation                 | J45.41  |
|             | Moderate persistent asthma with status asthmaticus                 | J45.42  |
|             | Severe persistent asthma with acute exacerbation                   | J45.51  |
|             | Severe persistent asthma with status asthmaticus                   | J45.52  |
|             | Unspecified asthma with acute exacerbation                         | J45.901 |
|             | Unspecified asthma with status asthmaticus                         | J45.902 |
|             | COPD exacerbation                                                  |         |
|             | COPD exacerbation                                                  | J44.1   |
|             | Pneumothorax                                                       |         |

**eTable 2.** List of *ICD-10-CM* and Procedure Codes for Acute Complications

|                                                                    |         |
|--------------------------------------------------------------------|---------|
| Pneumothorax                                                       | J93     |
| Acute upper respiratory infections                                 |         |
| Acute upper respiratory infections                                 | J00-J06 |
| Mediastinitis                                                      |         |
| Mediastinitis                                                      | J98.51  |
| Other Acute Lower Respiratory Tract Disease                        |         |
| Acute bronchitis                                                   | J20     |
| Acute bronchiolitis                                                | J21     |
| Unspecified acute lower respiratory infection                      | J22     |
| COPD with acute lower respiratory infection                        | J44.0   |
| Bronchiectasis with acute lower respiratory infection              | J47.1   |
| Bronchiectasis with acute exacerbation                             | J47.9   |
| Gangrene and necrosis of lung                                      | J85.0   |
| Abscess of lung without pneumonia                                  | J85.2   |
| Abscess of mediastinum                                             | J85.3   |
| Pyothorax                                                          | J86     |
| Pyothorax with fistula                                             | J86.0   |
| Pyothorax without fistula                                          | J86.9   |
| Pulmonary collapse                                                 |         |
| Atelectasis                                                        | J98.11  |
| Other pulmonary collapse                                           | J98.19  |
| <b>Cardiac</b>                                                     |         |
| Acute myocardial infarction or unstable angina                     |         |
| Unstable angina                                                    | I20.0   |
| Acute myocardial infarction                                        | I21     |
| Subsequent ST elevation and non-ST elevation myocardial infarction | I22     |
| Other acute and subacute forms of ischemic heart disease           | I24     |
| Acute Congestive Heart Failure                                     |         |
| Acute systolic heart failure                                       | I50.21  |
| Acute on chronic systolic heart failure                            | I50.23  |
| Acute diastolic heart failure                                      | I50.31  |
| Acute on chronic diastolic heart failure                           | I50.33  |
| Acute combined systolic and diastolic heart failure                | I50.41  |

**eTable 2.** List of *ICD-10-CM* and Procedure Codes for Acute Complications

|                                                                            |         |
|----------------------------------------------------------------------------|---------|
| Acute on chronic combined systolic and diastolic heart failure             | I50.43  |
| Acute right heart failure                                                  | I50.811 |
| Acute on chronic right heart failure                                       | I50.813 |
| Cardiogenic Shock                                                          |         |
| Cardiogenic Shock                                                          | R57.0   |
| Hypertensive Crisis                                                        |         |
| Hypertensive Crisis                                                        | I16     |
| Acute Myocarditis                                                          |         |
| Acute myocarditis                                                          | I40     |
| Influenza due to other identified influenza virus with myocarditis         | J10.82  |
| Influenza due to unidentified influenza virus with myocarditis             | J11.82  |
| Acute Pericarditis                                                         |         |
| Acute Pericarditis                                                         | I30     |
| Cardiac Tamponade                                                          |         |
| Cardiac Tamponade                                                          | I31.4   |
| <b>Hematologic/vascular</b>                                                |         |
| Deep vein thrombosis                                                       |         |
| Acute embolism and thrombosis of superior vena cava                        | I82.210 |
| Acute embolism and thrombosis of other thoracic veins                      | I82.290 |
| Acute embolism and thrombosis of inferior vena cava                        | I82.220 |
| Acute embolism and thrombosis of unspecified deep veins of lower extremity | I82.4   |
| Acute embolism and thrombosis of veins of upper extremity                  | I82.6   |
| Acute embolism and thrombosis of axillary vein                             | I82.A1  |
| Acute embolism and thrombosis of subclavian vein                           | I82.B1  |
| Acute embolism and thrombosis of internal jugular vein                     | I82.C1  |
| Pulmonary embolism                                                         |         |
| Pulmonary embolism                                                         | I26     |
| Disseminated intravascular coagulation                                     |         |
| Disseminated intravascular coagulation                                     | D65     |
| Hemaphagocytic Syndrome                                                    |         |
| Hemophagocytic lymphohistiocytosis                                         | D76.1   |
| Hemophagocytic syndrome, infection-associated                              | D76.2   |
| Immune Thrombocytopenic Purpura                                            |         |



**eTable 2.** List of *ICD-10-CM* and Procedure Codes for Acute Complications

|                   |                                                                    |                    |
|-------------------|--------------------------------------------------------------------|--------------------|
|                   | Immune Thrombocytopenic Purpura                                    | D69.3              |
| <b>Neurologic</b> |                                                                    |                    |
|                   | Cerebral Ischemia/Infarction                                       |                    |
|                   | Cerebral Infarction                                                | I63                |
|                   | Acute cerebrovascular insufficiency                                | I67.81             |
|                   | Cerebral Ischemia                                                  | I67.82             |
|                   | Transient cerebral ischemic attacks and related syndromes          | G45                |
|                   | Intracranial Hemorrhage                                            |                    |
|                   | Intracranial Hemorrhage                                            | I60, I61, I62      |
|                   | Acute Disseminated Encephalitis and Encephalomyelitis              |                    |
|                   | Acute Disseminated Encephalitis and Encephalomyelitis              | G04.0              |
|                   | Demyelinating Disease                                              |                    |
|                   | Demyelinating Disease                                              | G36                |
|                   | Encephalitis                                                       |                    |
|                   | Encephalitis                                                       | G04-G05            |
|                   | Guillain-Barre Syndrome                                            |                    |
|                   | Guillain-Barre Syndrome                                            | G61.0              |
|                   | Meningitis                                                         |                    |
|                   | Meningitis                                                         | G00, G01, G02, G03 |
| <b>Endocrine</b>  |                                                                    |                    |
|                   | Diabetic Ketoacidosis                                              |                    |
|                   | Diabetes mellitus due to underlying condition with ketoacidosis    | E08.1              |
|                   | Drug or chemical induced diabetes mellitus with ketoacidosis       | E09.1              |
|                   | Type 1 diabetes mellitus with ketoacidosis                         | E10.1              |
|                   | Type 2 diabetes mellitus with ketoacidosis                         | E11.1              |
|                   | Other specified diabetes mellitus with ketoacidosis                | E13.1              |
|                   | Hyperglycemic Hyperosmolar Syndrome                                |                    |
|                   | Diabetes mellitus due to underlying condition with hyperosmolarity | E08.0              |
|                   | Drug or chemical induced diabetes mellitus with hyperosmolarity    | E09.0              |
|                   | Type 2 diabetes mellitus with hyperosmolarity                      | E11.0              |
|                   | Other specified diabetes mellitus with hyperosmolarity             | E13.0              |
|                   | Thyrotoxicosis                                                     |                    |
|                   | Thyrotoxicosis                                                     | E05                |

**eTable 2.** List of *ICD-10-CM* and Procedure Codes for Acute Complications

|                                       |                                                                                                                                         |                          |
|---------------------------------------|-----------------------------------------------------------------------------------------------------------------------------------------|--------------------------|
| <b>Gastrointestinal</b>               |                                                                                                                                         |                          |
|                                       | Acute hepatitis and liver failure                                                                                                       |                          |
|                                       | Acute and subacute hepatic failure                                                                                                      | K72.0                    |
|                                       | Acute hepatitis A                                                                                                                       | B15                      |
|                                       | Acute hepatitis B                                                                                                                       | B16                      |
|                                       | Other acute viral hepatitis                                                                                                             | B17                      |
|                                       | Unspecified viral hepatitis with hepatic coma                                                                                           | B19.0                    |
|                                       | Unspecified viral hepatitis B with hepatic coma                                                                                         | B19.11                   |
|                                       | Unspecified viral hepatitis C with hepatic coma                                                                                         | B19.21                   |
|                                       | Acute pancreatitis                                                                                                                      |                          |
|                                       | Acute pancreatitis                                                                                                                      | K85                      |
| <b>Renal</b>                          |                                                                                                                                         |                          |
|                                       | Acute Kidney Failure                                                                                                                    |                          |
|                                       | Acute Kidney Failure                                                                                                                    | N17                      |
|                                       | Dialysis                                                                                                                                |                          |
|                                       | Encounter for care involving renal dialysis                                                                                             | Z49                      |
|                                       | Dependence on renal dialysis                                                                                                            | Z99.2                    |
|                                       | Hypotension of hemodialysis                                                                                                             | I95.3                    |
|                                       | Patient's noncompliance with renal dialysis                                                                                             | Z91.15                   |
|                                       | Hemodialysis procedure                                                                                                                  | CPT*: 90935, 90937       |
|                                       | Hemodialysis access flow study to determine blood flow in grafts and arteriovenous fistulae by an indicator method                      | CPT: 90940               |
|                                       | Dialysis procedure other than hemodialysis (e.g., peritoneal dialysis, hemofiltration, or other continuous renal replacement therapies) | CPT: 90945, 90947        |
|                                       | Other dialysis procedures                                                                                                               | CPT: 90999               |
|                                       | Hemodialysis plan docd                                                                                                                  | CPT: 0505F               |
|                                       | Hemodialysis via catheter                                                                                                               | CPT: 4054F               |
|                                       | Insertion of cannula for hemodialysis, other purpose (separate procedure)                                                               | CPT: 36800, 36810, 36815 |
| <b>Sepsis</b>                         |                                                                                                                                         |                          |
|                                       | Streptococcal sepsis                                                                                                                    | A40                      |
|                                       | Other sepsis                                                                                                                            | A41                      |
|                                       | Symptoms and signs specifically associated with systemic inflammation and infection                                                     | R65                      |
| *CPT = current procedural terminology |                                                                                                                                         |                          |

**eTable 3.** Full Multivariable Results for COVID-19 Hospitalization Outcomes Among People Experiencing Incarceration and People Experiencing Homelessness, United States, April 2020–June 2021

|                                      | ICU Admission |      |            |            |                |            |
|--------------------------------------|---------------|------|------------|------------|----------------|------------|
|                                      | Admitted      |      | Unadjusted |            | Fully adjusted |            |
|                                      | n             | %    | RR†        | 95% CI     | RR†            | 95% CI     |
| Population                           |               |      |            |            |                |            |
| PEI*                                 | 683           | 31.5 | 0.99       | 0.80, 1.23 | 0.95           | 0.80, 1.13 |
| PEH                                  | 1922          | 31.6 | 1.00       | 0.90, 1.10 | 0.92           | 0.85, 1.01 |
| General population                   | 197683        | 31.7 | Reference  |            | Reference      |            |
| Age                                  |               |      |            |            |                |            |
| Continuous (10-year increment)       |               |      | 1.05       | 1.04, 1.06 | 1.06           | 1.05, 1.07 |
| Sex                                  |               |      |            |            |                |            |
| Male                                 | 108750        | 33.5 | 1.13       | 1.11, 1.14 | 1.12           | 1.10, 1.13 |
| Female                               | 91538         | 29.7 | Reference  |            | Reference      |            |
| Race and ethnicity                   |               |      |            |            |                |            |
| Asian, non-Hispanic                  | 4786          | 29.4 | 0.92       | 0.79, 1.07 | 0.90           | 0.80, 1.01 |
| Black, non-Hispanic                  | 34202         | 30.2 | 0.94       | 0.86, 1.04 | 1.01           | 0.93, 1.10 |
| White, non-Hispanic                  | 109656        | 32.0 | Reference  |            | Reference      |            |
| Hispanic                             | 35660         | 34.0 | 1.06       | 0.92, 1.23 | 1.04           | 0.90, 1.20 |
| Other race, non-Hispanic             | 11257         | 29.3 | 0.92       | 0.76, 1.11 | 0.95           | 0.82, 1.11 |
| Unknown                              | 4727          | 28.1 | 0.88       | 0.73, 1.06 | 0.96           | 0.84, 1.11 |
| Geographic divisions (1st encounter) |               |      |            |            |                |            |
| Northeast                            | 22740         | 20.0 | 0.60       | 0.43, 0.83 | 0.60           | 0.43, 0.83 |
| Midwest                              | 35817         | 27.1 | 0.81       | 0.65, 1.00 | 0.80           | 0.65, 0.99 |
| South                                | 99203         | 33.5 | Reference  |            | Reference      |            |
| West                                 | 42528         | 46.8 | 1.40       | 1.15, 1.69 | 1.40           | 1.15, 1.69 |
| Rural/Urban (1st encounter)          |               |      |            |            |                |            |
| Rural                                | 20799         | 27.2 | 0.84       | 0.68, 1.05 | 0.81           | 0.66, 1.00 |
| Urban                                | 179489        | 32.3 | Reference  |            | Reference      |            |
| Other medical comorbidities          |               |      |            |            |                |            |
| Serious mental illness               | 8189          | 30.8 | 0.97       | 0.93, 1.02 | 1.04           | 1.00, 1.07 |
| No serious mental illness            | 192099        | 31.7 | Reference  |            | Reference      |            |
| Disability                           |               |      |            |            |                |            |
| Disability                           | 28830         | 33.2 | 1.06       | 1.01, 1.10 | 1.03           | 1.00, 1.07 |
| No disability                        | 171458        | 31.4 | Reference  |            | Reference      |            |
| Wave                                 |               |      |            |            |                |            |
| April 1, 2020 to May 31, 2020        | 18073         | 25.8 | Reference  |            | Reference      |            |
| June 1, 2020 to August 31, 2020      | 35311         | 36.6 | 1.42       | 1.23, 1.63 | 1.13           | 1.04, 1.24 |
| September 1, 2020 to June 30, 2021   | 146904        | 31.5 | 1.22       | 1.09, 1.36 | 1.05           | 0.96, 1.14 |

Abbreviations: CI, confidence interval; ICU, intensive care unit; PEH, people experiencing homelessness; PEI, people experiencing incarceration; RR, risk ratio; IRR, incident rate ratio

\* Patients with ICD-10-CM codes for PEI and PEH are included in PEI cohort

† Log-binomial model, risk ratio reported

‡ Alternative revised Poisson model, risk ratio reported

§ Zero-truncated negative binomial model, incident rate ratio reported

|| Not mutually exclusive, estimated separately

**eTable 3.** Full Multivariable Results for COVID-19 Hospitalization Outcomes Among People Experiencing Incarceration and People Experiencing Homelessness, United States, April 2020–June 2021

|                                      | Invasive Mechanical Ventilation |      |            |            |                |            |
|--------------------------------------|---------------------------------|------|------------|------------|----------------|------------|
|                                      | Ventilated                      |      | Unadjusted |            | Fully adjusted |            |
|                                      | No.                             | %    | RR†        | 95% CI     | RR†            | 95% CI     |
| Population                           |                                 |      |            |            |                |            |
| PEI*                                 | 401                             | 18.9 | 1.33       | 1.19, 1.48 | 1.16           | 1.04, 1.30 |
| PEH                                  | 606                             | 10.0 | 0.70       | 0.63, 0.77 | 0.64           | 0.58, 0.70 |
| General population                   | 88897                           | 14.2 | Reference  |            | Reference      |            |
| Age                                  |                                 |      |            |            |                |            |
| Continuous (10-year increment)       |                                 |      | 1.06       | 1.05, 1.07 | 1.07           | 1.06, 1.08 |
| Sex                                  |                                 |      |            |            |                |            |
| Male                                 | 54250                           | 16.7 | 1.44       | 1.42, 1.46 | 1.44           | 1.42, 1.46 |
| Female                               | 35663                           | 11.6 | Reference  |            | Reference      |            |
| Race and ethnicity                   |                                 |      |            |            |                |            |
| Asian, non-Hispanic                  | 2649                            | 16.3 | 1.22       | 1.15, 1.30 | 1.22           | 1.16, 1.30 |
| Black, non-Hispanic                  | 16085                           | 14.2 | 1.06       | 1.02, 1.11 | 1.13           | 1.09, 1.18 |
| White, non-Hispanic                  | 45803                           | 13.4 | Reference  |            | Reference      |            |
| Hispanic                             | 15713                           | 15.0 | 1.12       | 1.05, 1.20 | 1.19           | 1.11, 1.27 |
| Other race, non-Hispanic             | 6752                            | 17.6 | 1.32       | 1.24, 1.40 | 1.33           | 1.24, 1.42 |
| Unknown                              | 2911                            | 17.3 | 1.29       | 1.20, 1.40 | 1.34           | 1.24, 1.44 |
| Geographic divisions (1st encounter) |                                 |      |            |            |                |            |
| Northeast                            | 15795                           | 13.9 | 1.01       | 0.92, 1.10 | 0.91           | 0.83, 0.99 |
| Midwest                              | 18566                           | 14.0 | 1.01       | 0.93, 1.11 | 1.01           | 0.92, 1.10 |
| South                                | 40914                           | 13.8 | Reference  |            | Reference      |            |
| West                                 | 14638                           | 16.1 | 1.16       | 1.05, 1.29 | 1.16           | 1.04, 1.29 |
| Rural/Urban (1st encounter)          |                                 |      |            |            |                |            |
| Rural                                | 10210                           | 13.4 | 0.93       | 0.84, 1.04 | 0.97           | 0.87, 1.08 |
| Urban                                | 79703                           | 14.3 | Reference  |            | Reference      |            |
| Other medical comorbidities          |                                 |      |            |            |                |            |
| Serious mental illness               | 4060                            | 15.3 | 1.08       | 1.04, 1.12 | 1.14           | 1.10, 1.19 |
| No serious mental illness            | 85853                           | 14.2 | Reference  |            | Reference      |            |
| Disability                           |                                 |      |            |            |                |            |
| Disability                           | 13897                           | 16.0 | 1.15       | 1.11, 1.19 | 1.09           | 1.06, 1.12 |
| No disability                        | 76016                           | 13.9 | Reference  |            | Reference      |            |
| Wave                                 |                                 |      |            |            |                |            |
| April 1, 2020 to May 31, 2020        | 12542                           | 17.9 | Reference  |            | Reference      |            |
| June 1, 2020 to August 31, 2020      | 13789                           | 14.3 | 0.80       | 0.75, 0.84 | 0.79           | 0.76, 0.83 |
| September 1, 2020 to June 30, 2021   | 63582                           | 13.6 | 0.76       | 0.73, 0.79 | 0.77           | 0.74, 0.80 |

Abbreviations: CI, confidence interval; ICU, intensive care unit; PEH, people experiencing homelessness; PEI, people experiencing incarceration; RR, risk ratio; IRR, incident rate ratio

\* Patients with ICD-10-CM codes for PEI and PEH are included in PEI cohort

† Log-binomial model, risk ratio reported

‡ Alternative revised Poisson model, risk ratio reported

§ Zero-truncated negative binomial model, incident rate ratio reported

|| Not mutually exclusive, estimated separately

**Table 3.** Full Multivariable Results for COVID-19 Hospitalization Outcomes Among People Experiencing Incarceration and People Experiencing Homelessness, United States, April 2020–June 2021

|                                      | In-Hospital Mortality |      |            |            |                |            |
|--------------------------------------|-----------------------|------|------------|------------|----------------|------------|
|                                      | Died                  |      | Unadjusted |            | Fully adjusted |            |
|                                      | No.                   | %    | RR†        | 95% CI     | RR‡            | 95% CI     |
| Population                           |                       |      |            |            |                |            |
| PEI*                                 | 308                   | 14.2 | 1.05       | 0.89, 1.23 | 1.28           | 1.11, 1.47 |
| PEH                                  | 330                   | 5.4  | 0.40       | 0.35, 0.45 | 0.53           | 0.47, 0.59 |
| General population                   | 84725                 | 13.6 | Reference  |            | Reference      |            |
| Age                                  |                       |      |            |            |                |            |
| Continuous (10-year increment)       |                       |      | 1.43       | 1.42, 1.44 | 1.45           | 1.44, 1.47 |
| Sex                                  |                       |      |            |            |                |            |
| Male                                 | 50454                 | 15.5 | 1.37       | 1.35, 1.39 | 1.41           | 1.39, 1.43 |
| Female                               | 34909                 | 11.3 | Reference  |            | Reference      |            |
| Race and ethnicity                   |                       |      |            |            |                |            |
| Asian, non-Hispanic                  | 2222                  | 13.6 | 0.98       | 0.92, 1.05 | 1.09           | 1.03, 1.16 |
| Black, non-Hispanic                  | 13743                 | 12.1 | 0.87       | 0.84, 0.91 | 1.11           | 1.07, 1.15 |
| White, non-Hispanic                  | 47563                 | 13.9 | Reference  |            | Reference      |            |
| Hispanic                             | 13106                 | 12.5 | 0.90       | 0.84, 0.97 | 1.23           | 1.14, 1.32 |
| Other race, non-Hispanic             | 6156                  | 16.0 | 1.16       | 1.07, 1.26 | 1.31           | 1.23, 1.40 |
| Unknown                              | 2573                  | 15.3 | 1.10       | 1.03, 1.18 | 1.30           | 1.22, 1.37 |
| Geographic divisions (1st encounter) |                       |      |            |            |                |            |
| Northeast                            | 18345                 | 16.2 | 1.28       | 1.18, 1.38 | 1.08           | 1.00, 1.16 |
| Midwest                              | 16554                 | 12.5 | 0.99       | 0.92, 1.06 | 0.93           | 0.87, 1.00 |
| South                                | 37446                 | 12.7 | Reference  |            | Reference      |            |
| West                                 | 13018                 | 14.3 | 1.13       | 1.04, 1.23 | 1.18           | 1.08, 1.28 |
| Rural/Urban (1st encounter)          |                       |      |            |            |                |            |
| Rural                                | 9785                  | 12.8 | 0.94       | 0.86, 1.03 | 0.95           | 0.86, 1.04 |
| Urban                                | 75578                 | 13.6 | Reference  |            | Reference      |            |
| Other medical comorbidities          |                       |      |            |            |                |            |
| Serious mental illness               | 3330                  | 12.5 | 0.93       | 0.89, 0.97 | 1.12           | 1.08, 1.17 |
| No serious mental illness            | 82033                 | 13.5 | Reference  |            | Reference      |            |
| Disability                           |                       |      |            |            |                |            |
| Disability                           | 15529                 | 17.9 | 1.40       | 1.36, 1.43 | 1.08           | 1.06, 1.11 |
| No disability                        | 69834                 | 12.8 | Reference  |            | Reference      |            |
| Wave                                 |                       |      |            |            |                |            |
| April 1, 2020 to May 31, 2020        | 13057                 | 18.7 | Reference  |            | Reference      |            |
| June 1, 2020 to August 31, 2020      | 11863                 | 12.3 | 0.66       | 0.61, 0.71 | 0.75           | 0.70, 0.79 |
| September 1, 2020 to June 30, 2021   | 60443                 | 13.0 | 0.69       | 0.66, 0.73 | 0.74           | 0.71, 0.77 |

Abbreviations: CI, confidence interval; ICU, intensive care unit; PEH, people experiencing homelessness; PEI, people experiencing incarceration; RR, risk ratio; IRR, incident rate ratio

\* Patients with ICD-10-CM codes for PEI and PEH are included in PEI cohort

† Log-binomial model, risk ratio reported

‡ Alternative revised Poisson model, risk ratio reported

§ Zero-truncated negative binomial model, incident rate ratio reported

|| Not mutually exclusive, estimated separately

**eTable 3.** Full Multivariable Results for COVID-19 Hospitalization Outcomes Among People Experiencing Incarceration and People Experiencing Homelessness, United States, April 2020–June 2021

|                                      | 30-Day Readmission for COVID-19 |     |            |            |                |            |
|--------------------------------------|---------------------------------|-----|------------|------------|----------------|------------|
|                                      | Readmitted                      |     | Unadjusted |            | Fully adjusted |            |
|                                      | No.                             | %   | RR†        | 95% CI     | RR‡            | 95% CI     |
| Population                           |                                 |     |            |            |                |            |
| PEI*                                 | 128                             | 5.9 | 1.29       | 1.06, 1.57 | 1.45           | 1.18, 1.78 |
| PEH                                  | 519                             | 8.5 | 1.87       | 1.71, 2.04 | 2.10           | 1.92, 2.30 |
| General population                   | 28493                           | 4.6 | Reference  |            | Reference      |            |
| Age                                  |                                 |     |            |            |                |            |
| Continuous (10-year increment)       |                                 |     | 1.21       | 1.20, 1.22 | 1.20           | 1.19, 1.22 |
| Sex                                  |                                 |     |            |            |                |            |
| Male                                 | 15884                           | 4.9 | 1.14       | 1.11, 1.16 | 1.13           | 1.11, 1.16 |
| Female                               | 13256                           | 4.3 | Reference  |            | Reference      |            |
| Race and ethnicity                   |                                 |     |            |            |                |            |
| Asian, non-Hispanic                  | 648                             | 4.0 | 0.79       | 0.71, 0.87 | 0.90           | 0.81, 0.99 |
| Black, non-Hispanic                  | 5317                            | 4.7 | 0.93       | 0.89, 0.97 | 1.05           | 1.01, 1.09 |
| White, non-Hispanic                  | 17344                           | 5.1 | Reference  |            | Reference      |            |
| Hispanic                             | 3843                            | 3.7 | 0.72       | 0.69, 0.76 | 0.89           | 0.85, 0.94 |
| Other race, non-Hispanic             | 1457                            | 3.8 | 0.75       | 0.70, 0.81 | 0.86           | 0.80, 0.92 |
| Unknown                              | 531                             | 3.2 | 0.62       | 0.57, 0.69 | 0.71           | 0.65, 0.78 |
| Geographic divisions (1st encounter) |                                 |     |            |            |                |            |
| Northeast                            | 5231                            | 4.6 | 1.01       | 0.92, 1.10 | 1.02           | 0.94, 1.10 |
| Midwest                              | 6519                            | 4.9 | 1.08       | 1.01, 1.15 | 1.05           | 0.99, 1.11 |
| South                                | 13551                           | 4.6 | Reference  |            | Reference      |            |
| West                                 | 3839                            | 4.2 | 0.92       | 0.86, 0.99 | 0.97           | 0.90, 1.03 |
| Rural/Urban (1st encounter)          |                                 |     |            |            |                |            |
| Rural                                | 3755                            | 4.9 | 1.08       | 1.01, 1.15 | 1.02           | 0.96, 1.09 |
| Urban                                | 25385                           | 4.6 | Reference  |            | Reference      |            |
| Other medical comorbidities          |                                 |     |            |            |                |            |
| Serious mental illness               | 1595                            | 6.0 | 1.32       | 1.25, 1.39 | 1.33           | 1.26, 1.40 |
| No serious mental illness            | 27545                           | 4.5 | Reference  |            | Reference      |            |
| Disability                           |                                 |     |            |            |                |            |
| Disability                           | 5659                            | 6.5 | 1.51       | 1.46, 1.57 | 1.28           | 1.24, 1.33 |
| No disability                        | 23481                           | 4.3 | Reference  |            | Reference      |            |
| Wave                                 |                                 |     |            |            |                |            |
| April 1, 2020 to May 31, 2020        | 3016                            | 4.3 | Reference  |            | Reference      |            |
| June 1, 2020 to August 31, 2020      | 4879                            | 5.1 | 1.18       | 1.10, 1.25 | 1.27           | 1.20, 1.35 |
| September 1, 2020 to June 30, 2021   | 21245                           | 4.6 | 1.06       | 1.00, 1.12 | 1.07           | 1.01, 1.13 |

Abbreviations: CI, confidence interval; ICU, intensive care unit; PEH, people experiencing homelessness; PEI, people experiencing incarceration; RR, risk ratio; IRR, incident rate ratio

\* Patients with ICD-10-CM codes for PEI and PEH are included in PEI cohort

† Log-binomial model, risk ratio reported

‡ Alternative revised Poisson model, risk ratio reported

§ Zero-truncated negative binomial model, incident rate ratio reported

|| Not mutually exclusive, estimated separately

**eTable 3.** Full Multivariable Results for COVID-19 Hospitalization Outcomes Among People Experiencing Incarceration and People Experiencing Homelessness, United States, April 2020–June 2021

|                                      | Length of Stay |                    |            |            |                |            |
|--------------------------------------|----------------|--------------------|------------|------------|----------------|------------|
|                                      | Days           |                    | Unadjusted |            | Fully adjusted |            |
|                                      | Mean           | Standard deviation | IRR§       | 95% CI     | IRR§           | 95% CI     |
| Population                           |                |                    |            |            |                |            |
| PEI*                                 | 9.03           | 10.13              | 1.11       | 1.06, 1.16 | 1.11           | 1.06, 1.16 |
| PEH                                  | 10.68          | 25.56              | 1.23       | 1.20, 1.26 | 1.24           | 1.20, 1.27 |
| General population                   | 8.36           | 9.68               | Reference  |            | Reference      |            |
| Age                                  |                |                    |            |            |                |            |
| Continuous (10-year increment)       |                |                    | 1.10       | 1.10, 1.10 | 1.10           | 1.10, 1.11 |
| Sex                                  |                |                    |            |            |                |            |
| Male                                 | 8.93           | 10.67              | 1.16       | 1.15, 1.16 | 1.16           | 1.16, 1.17 |
| Female                               | 7.81           | 9.10               | Reference  |            | Reference      |            |
| Race and ethnicity                   |                |                    |            |            |                |            |
| Asian, non-Hispanic                  | 9.06           | 10.76              | 1.03       | 1.01, 1.05 | 1.09           | 1.07, 1.11 |
| Black, non-Hispanic                  | 8.53           | 10.13              | 1.00       | 0.99, 1.01 | 1.06           | 1.05, 1.07 |
| White, non-Hispanic                  | 8.07           | 8.96               | Reference  |            | Reference      |            |
| Hispanic                             | 8.82           | 11.20              | 1.04       | 1.03, 1.05 | 1.15           | 1.14, 1.16 |
| Other race, non-Hispanic             | 9.11           | 12.92              | 1.04       | 1.03, 1.05 | 1.11           | 1.10, 1.12 |
| Unknown                              | 8.91           | 10.83              | 1.05       | 1.03, 1.07 | 1.11           | 1.09, 1.13 |
| Geographic divisions (1st encounter) |                |                    |            |            |                |            |
| Northeast                            | 9.11           | 11.81              | 1.11       | 1.03, 1.20 | 1.02           | 0.95, 1.09 |
| Midwest                              | 7.61           | 8.39               | 0.89       | 0.84, 0.95 | 0.89           | 0.84, 0.94 |
| South                                | 8.34           | 9.64               | Reference  |            | Reference      |            |
| West                                 | 8.76           | 10.42              | 0.98       | 0.91, 1.05 | 0.98           | 0.92, 1.05 |
| Rural/Urban (1st encounter)          |                |                    |            |            |                |            |
| Rural                                | 7.28           | 7.77               | 0.72       | 0.69, 0.76 | 0.72           | 0.69, 0.76 |
| Urban                                | 8.54           | 10.21              | Reference  |            | Reference      |            |
| Other medical comorbidities          |                |                    |            |            |                |            |
| Serious mental illness               | 9.76           | 12.05              | 1.19       | 1.18, 1.21 | 1.23           | 1.21, 1.25 |
| No serious mental illness            | 8.33           | 9.85               | Reference  |            | Reference      |            |
| Disability                           |                |                    |            |            |                |            |
| Disability                           | 10.11          | 12.00              | 1.28       | 1.27, 1.29 | 1.22           | 1.21, 1.22 |
| No disability                        | 8.11           | 9.56               | Reference  |            | Reference      |            |
| Wave                                 |                |                    |            |            |                |            |
| April 1, 2020 to May 31, 2020        | 9.36           | 11.03              | Reference  |            | Reference      |            |
| June 1, 2020 to August 31, 2020      | 8.71           | 10.66              | 0.93       | 0.92, 0.94 | 0.95           | 0.94, 0.96 |
| September 1, 2020 to June 30, 2021   | 8.18           | 9.62               | 0.89       | 0.89, 0.90 | 0.91           | 0.90, 0.92 |

Abbreviations: CI, confidence interval; ICU, intensive care unit; PEH, people experiencing homelessness; PEI, people experiencing incarceration; RR, risk ratio; IRR, incident rate ratio

\* Patients with ICD-10-CM codes for PEI and PEH are included in PEI cohort

† Log-binomial model, risk ratio reported

‡ Alternative revised Poisson model, risk ratio reported

§ Zero-truncated negative binomial model, incident rate ratio reported

|| Not mutually exclusive, estimated separately

**eTable 4.** Sensitivity Analyses for COVID-19 Hospitalization Outcomes for People Experiencing Incarceration and People Experiencing Homelessness, United States, April 2020–June 2021

|                                  | PEI defined by ICD-10-CM codes |            | PEI defined by admission code |            | Controlling for Payer Source |            | Controlling for Underlying Medical Conditions |            |
|----------------------------------|--------------------------------|------------|-------------------------------|------------|------------------------------|------------|-----------------------------------------------|------------|
|                                  | RR or IRR                      | 95% CI     | RR or IRR                     | 95% CI     | RR or IRR                    | 95% CI     | RR or IRR                                     | 95% CI     |
| ICU Admission†                   |                                |            |                               |            |                              |            |                                               |            |
| PEI*                             | 1.10                           | 0.94, 1.28 | 0.87                          | 0.69, 1.09 | 0.97                         | 0.82, 1.15 | 0.94                                          | 0.79, 1.11 |
| PEH                              | 0.92                           | 0.84, 1.00 | 0.92                          | 0.85, 1.00 | 0.95                         | 0.88, 1.03 | 0.89                                          | 0.81, 0.96 |
| Invasive Mechanical Ventilation† |                                |            |                               |            |                              |            |                                               |            |
| PEI*                             | 1.43                           | 1.25, 1.63 | 0.93                          | 0.81, 1.08 | 1.17                         | 1.04, 1.31 | 1.14                                          | 1.03, 1.26 |
| PEH                              | 0.64                           | 0.58, 0.70 | 0.63                          | 0.58, 0.69 | 0.62                         | 0.57, 0.68 | 0.55                                          | 0.50, 0.61 |
| In-Hospital Mortality‡           |                                |            |                               |            |                              |            |                                               |            |
| PEI*                             | 1.51                           | 1.27, 1.79 | 1.07                          | 0.88, 1.30 | 1.32                         | 1.15, 1.52 | 1.26                                          | 1.09, 1.45 |
| PEH                              | 0.52                           | 0.46, 0.58 | 0.52                          | 0.46, 0.59 | 0.51                         | 0.45, 0.57 | 0.47                                          | 0.42, 0.53 |
| 30-Day Readmission for COVID-19‡ |                                |            |                               |            |                              |            |                                               |            |
| PEI*                             | 1.48                           | 1.13, 1.94 | 1.60                          | 1.27, 2.00 | 1.53                         | 1.25, 1.86 | 1.44                                          | 1.18, 1.77 |
| PEH                              | 2.13                           | 1.96, 2.33 | 2.11                          | 1.93, 2.30 | 1.99                         | 1.82, 2.18 | 1.98                                          | 1.81, 2.16 |
| Length of Stay§                  |                                |            |                               |            |                              |            |                                               |            |
| PEI*                             | 1.17                           | 1.10, 1.25 | 1.04                          | 0.99, 1.10 | 1.12                         | 1.07, 1.17 | 1.13                                          | 1.09, 1.18 |
| PEH                              | 1.23                           | 1.19, 1.26 | 1.23                          | 1.20, 1.26 | 1.21                         | 1.18, 1.25 | 1.14                                          | 1.11, 1.17 |

Abbreviations: CI, confidence interval; ICU, intensive care unit; PEH, people experiencing homelessness; PEI, people experiencing incarceration; RR, risk ratio; IRR, incident rate ratio

\* Patients with ICD-10-CM codes for PEI and PEH are included in PEI cohort

† Log-binomial model, risk ratio reported

‡ Alternative revised Poisson model, risk ratio reported

§ Zero-truncated negative binomial model, incident rate ratio reported
